# Supplementary material for: Optimization of viral resuspension methods for carbon-rich soils along a permafrost thaw gradient
Source: PeerJ. 2016 May 17;4:e1999. doi: 10.7717/peerj.1999 (PMC4878379; doi:10.7717/peerj.1999)
Supplement: Data S1 [file peerj-04-1999-s001.xlsx]

## Sheet: Exp1A
Sample	Virus Concentration (ml-1)	tech. average	tech. stdev	total viruses	Starting soil	viruses/g	avg viruses/g	Stdev	volume(mL)	nvirus (number of viruses counted)	nbeads (number of beads counted)	Vbeads (volume of beads used (ul))	Vsample (volume of stained sample used (ul))	Cbeads (bead stock conc ml-1)
KC Sphag A	2.34438e+08	2.29902e+08	6.41511e+06	2.18027e+09	5.4	4.03754e+08	4.17629e+08	3.30537e+07	9.3	257	172	2	10	784500000
	2.25365e+08			2.0959e+09		3.88129e+08				316	220	2	10	784500000
KC Sphag B	1.76869e+08	1.87651e+08	1.52475e+07	2.47617e+09	5.98	4.14075e+08			14	248	220	2	10	784500000
	1.98432e+08			2.77805e+09		4.64557e+08				215	170	2	10	784500000
KC Erio A	1.53382e+08	1.32377e+08	2.97063e+07	3.55846e+09	5.99	5.94067e+08	5.0491e+08	7.74556e+07	23.2	218	223	2	10	784500000
	1.11371e+08			2.58381e+09		4.31353e+08				159	224	2	10	784500000
KC Erio B	88256250	9.75852e+07	1.31931e+07	2292897375	5.1	4.49588e+08			25.98	126	224	2	10	784500000
	1.06914e+08			2.77763e+09		5.44633e+08				154	226	2	10	784500000
KC Palsa A	1.34791e+08	1.46552e+08	1.66327e+07	1.79273e+09	5.67	3.16177e+08	3.09311e+08	4.70056e+07	13.3	189	220	2	10	784500000
	1.58314e+08			2.10557e+09		3.71353e+08				224	222	2	10	784500000
KC Palsa B	9.66066e+07	9.21222e+07	6.34184e+06	1.40659e+09	4.88	2.88236e+08			14.56	141	229	2	10	784500000
	8.76378e+07			1.27601e+09		2.61477e+08				124	222	2	10	784500000
PP Sphag A	1.23868e+08	1.24454e+08	827781	2.60124e+09	5.77	4.50821e+08	4.04577e+08	5.61059e+07	21	210	266	2	10	784500000
	1.25039e+08			2.62582e+09		4.55082e+08				208	261	2	10	784500000
PP Sphag B	9.81489e+07	9.98568e+07	2.41536e+06	1.74705e+09	4.99	3.5011e+08			17.8	142	227	2	10	784500000
	1.01565e+08			1.80785e+09		3.62295e+08				145	224	2	10	784500000
PP Erio A	1.16222e+08	1.24303e+08	1.14284e+07	2.32444e+09	5.59	4.15822e+08	4.50596e+08	3.92822e+07	20	120	162	2	10	784500000
	132384375			2647687500		4.73647e+08				135	160	2	10	784500000
PP Erio B	8.95514e+07	9.75786e+07	1.13521e+07	2.24953e+09	5.37	4.18907e+08			25.12	121	212	2	10	784500000
	1.05606e+08			2.65282e+09		4.94007e+08				105	156	2	10	784500000
PP Palsa A	1.28373e+08	1.30669e+08	3.24801e+06	1.79722e+09	5.21	3.44956e+08	3.2526e+08	4.6178e+07	14	207	253	2	10	784500000
	1.32966e+08			1.86153e+09		3.57299e+08				200	236	2	10	784500000
PP Palsa B	9.34074e+07	1.08941e+08	2.19674e+07	1.44781e+09	5.64	2.56705e+08			15.5	153	257	2	10	784500000
	124474000			1929347000		3.42083e+08				119	150	2	10	784500000
AKC Sphag A	8.75519e+07	8.55047e+07	2.89524e+06	2.56177e+09	4.39	5.83547e+08	5.69037e+08	1.22699e+07	29.26	101	181	2	10	784500000
	8.34574e+07			2.44196e+09		5.56256e+08				100	188	2	10	784500000
AKC Sphag B	8.70709e+07	8.61346e+07	1.32405e+06	2.50416e+09	4.36	5.74348e+08			28.76	101	182	2	10	784500000
	8.51984e+07			2.45031e+09		5.61997e+08				101	186	2	10	784500000
AKC Erio A	1.0164e+08	1.03471e+08	2.5897e+06	3.01057e+09	4.41	6.82668e+08	6.89875e+08	1.19588e+07	29.62	103	159	2	10	784500000
	1.05302e+08			3.11905e+09		7.07267e+08				100	149	2	10	784500000
AKC Erio B	1.03921e+08	1.03411e+08	720422	3.07606e+09	4.47	6.88155e+08			29.6	102	154	2	10	784500000
	1.02902e+08			3.0459e+09		6.81409e+08				101	154	2	10	784500000
AKC Palsa A	1.22689e+08	1.26719e+08	5.70018e+06	1.88941e+09	4.08	4.6309e+08	4.59456e+08	2.74851e+07	15.4	104	133	2	10	784500000
	130750000			2013550000		4.93517e+08				100	120	2	10	784500000
AKC Palsa B	1.22844e+08	1.19106e+08	5.28671e+06	1.94954e+09	4.29	4.54438e+08			15.87	101	129	2	10	784500000
	1.15368e+08			1.83088e+09		4.2678e+08				100	136	2	10	784500000
			Sphag is Bog	Erio is fen

## Sheet: Exp 1B
Sample	Virus Concentration (ml-1)	tech. average	tech. stdev	total viruses	starting peat	viruses/g	avg viruses/gm	Stdev	volume(mL)	nvirus (number of viruses counted)	nbeads (number of beads counted)	Vbeads (volume of beads used (ul))	Vsample (volume of stained sample used (ul))	Cbeads (bead stock conc ml-1)
VX-P-A	2.97865e+08	3.14489e+08	2.35101e+07	2.44249e+09	5.34	4.57395e+08	4.69639e+08	3.10569e+07	8.2	243	128	2	10	784500000
	3.31113e+08			2.71513e+09		5.08451e+08				306	145	2	10	784500000
VX-P-B	2.18983e+08	2.09337e+08	1.36414e+07	2.38691e+09	5	4.77382e+08			10.9	194	139	2	10	784500000
	1.99691e+08			2.17663e+09		4.35326e+08				182	143	2	10	784500000
VX-S-A	1.18522e+08	1.28891e+08	1.46645e+07	2.63118e+09	4.85	5.42511e+08	6.24735e+08	6.22899e+07	22.2	105	139	2	10	784500000
	1.3926e+08			3.09158e+09		6.37439e+08				150	169	2	10	784500000
VX-S-B	1.64905e+08	1.56838e+08	1.14089e+07	3.92474e+09	5.66	6.93417e+08			23.8	206	196	2	10	784500000
	1.4877e+08			3.54074e+09		6.25572e+08				183	193	2	10	784500000
VX-E-A	1.29212e+08	1.29444e+08	327799	3.5404e+09	4.77	7.42223e+08	7.15851e+08	3.38564e+07	27.4	168	204	2	10	784500000
	1.29675e+08			3.5531e+09		7.44886e+08				181	219	2	10	784500000
VX-E-B	1.86349e+08	1.82759e+08	5.07649e+06	4.0065e+09	5.71	7.01664e+08			21.5	386	325	2	10	784500000
	1.7917e+08			3.85215e+09		6.74632e+08				354	310	2	10	784500000
BB-P-A	2.42555e+08	2.45729e+08	4.48984e+06	2.91066e+09	5.84	4.984e+08	5.15827e+08	6.02251e+07	12	303	196	2	10	784500000
	2.48904e+08			2.98685e+09		5.11447e+08				303	191	2	10	784500000
BB-P-B	3.00157e+08	3.47556e+08	6.70328e+07	2.19715e+09	4.83	4.54896e+08			7.32	308	161	2	10	784500000
	3.94955e+08			2.89107e+09		5.98566e+08				292	116	2	10	784500000
BB-S-A	1.40492e+08	1.59903e+08	2.74514e+07	2.80001e+09	4.55	6.15387e+08	7.05539e+08	8.72187e+07	19.93	137	153	2	10	784500000
	1.79314e+08			3.57373e+09		7.85436e+08				184	161	2	10	784500000
BB-S-B	1.32126e+08	1.4526e+08	1.85743e+07	3.30316e+09	5.11	6.46411e+08			25	128	152	2	10	784500000
	1.58394e+08			3.95986e+09		7.74923e+08				106	105	2	10	784500000
BB-E-A	2.0272e+08	2.24729e+08	3.11251e+07	3.79087e+09	5.63	6.73334e+08	7.65099e+08	8.83408e+07	18.7	146	113	2	10	784500000
	2.46738e+08			4.614e+09		8.19538e+08				195	124	2	10	784500000
BB-E-B	1.64443e+08	1.50034e+08	2.03773e+07	4.02886e+09	4.69	8.59032e+08			24.5	109	104	2	10	784500000
	1.35625e+08			3.32282e+09		7.08491e+08				102	118	2	10	784500000
SC-P-A	1.22689e+08	1.26719e+08	5.70018e+06	1.88941e+09	4.08	4.6309e+08	4.59456e+08	2.74851e+07	15.4	104	133	2	10	784500000
	130750000			2013550000		4.93517e+08				100	120	2	10	784500000
SC-P-B	1.22844e+08	1.19106e+08	5.28671e+06	1.94954e+09	4.29	4.54438e+08			15.87	101	129	2	10	784500000
	1.15368e+08			1.83088e+09		4.2678e+08				100	136	2	10	784500000
SC-S-A	8.75519e+07	8.55047e+07	2.89524e+06	2.56177e+09	4.39	5.83547e+08	5.69037e+08	1.22699e+07	29.26	101	181	2	10	784500000
	8.34574e+07			2.44196e+09		5.56256e+08				100	188	2	10	784500000
SC-S-B	8.70709e+07	8.61346e+07	1.32405e+06	2.50416e+09	4.36	5.74348e+08			28.76	101	182	2	10	784500000
	8.51984e+07			2.45031e+09		5.61997e+08				101	186	2	10	784500000
SC-E-A	1.0164e+08	1.03471e+08	2.5897e+06	3.01057e+09	4.41	6.82668e+08	6.89875e+08	1.19588e+07	29.62	103	159	2	10	784500000
	1.05302e+08			3.11905e+09		7.07267e+08				100	149	2	10	784500000
SC-E-B	1.03921e+08	1.03411e+08	720422	3.07606e+09	4.47	6.88155e+08			29.6	102	154	2	10	784500000
	1.02902e+08			3.0459e+09		6.81409e+08				101	154	2	10	784500000
			Vx is vortexing	BB is bead beating	Sc is sonication

## Sheet: Exp 2
Sample	Prepared	Counted	Virus Conc (ml-1)	Taverage	Tstdev	Baverage	Bstdev	volume	totalvirus	ave. total virus	Starting peat (g)	Naverage	Nstdev	viruses/g	ave. viruses/g	stdev	nvirus	nbeads	Vbeads (ul)	Vsample (ul)	Cbeads (ml-1)
sphag top frozen A 1	2014-08-07	2014-08-08	1.51035e+08	1.38631e+08	1.7541e+07	1.25747e+08	3.92386e+07	21.9	3.30766e+09	3.03602e+09	5.82	2.95311e+09	7.40207e+08	5.68326e+08	5.54784e+08	6.0261e+07	103	107	2	10	784500000
									2.76439e+09					4.74981e+08
sphag top frozen A 2	2014-08-14	2014-08-14	1.26228e+08														107	133	2	10	784500000
sphag top frozen B 1	2014-08-12	2014-08-12	7.15075e+07	8.16856e+07	1.4394e+07			29.4	2.10232e+09	2.40156e+09	4.31			4.87778e+08			103	226	2	10	784500000
									2.70079e+09					6.26634e+08
sphag top frozen B 2	2014-08-13	2014-08-13	9.18637e+07														113	193	2	10	784500000
sphag top frozen C 1	2014-08-07	2014-08-08	1.55377e+08	1.56923e+08	2.18659e+06			22.2	3.44936e+09	3.48369e+09	5.95			5.79725e+08			102	103	2	10	784500000
									3518011800					5.91262e+08
sphag top frozen C 2	2014-08-15	2014-08-15	158469000														101	100	2	10	784500000
sphag bottom frozen A 1	2014-08-07	2014-08-07	1.36323e+08	1.35883e+08	621802	1.33634e+08	2.01176e+07	16.3	2.22206e+09	2.2149e+09	5.01	2.19909e+09	3.34959e+08	4.43526e+08	4.65005e+08	6.33734e+07	106	122	2	10	784500000
									2.20773e+09					4.40665e+08
sphag bottom frozen A 2	2014-08-13	2014-08-13	1.35444e+08														101	117	2	10	784500000
sphag bottom frozen B 1	2014-08-14	2014-08-14	1.36323e+08	1.52532e+08	2.29234e+07			18.5	2.52197e+09	2.82185e+09	5.31			4.74948e+08			106	122	2	10	784500000
									3.12172e+09					5.87894e+08
sphag bottom frozen B 2	2014-08-14	2014-08-14	1.68742e+08														114	106	2	10	784500000
sphag bottom frozen C 1	2014-08-07	2014-08-07	1.13696e+08	1.12486e+08	1.71053e+06			16.3	1.85324e+09	1.83352e+09	4.35			4.26032e+08			100	138	2	10	784500000
									1.81381e+09					4.16967e+08
sphag bottom frozen C 2	2014-08-13	2014-08-14	1.11277e+08														100	141	2	10	784500000
palsa top frozen A 1	2014-08-11	2014-08-11	2.44402e+08	2.38423e+08	8.45521e+06	2.18872e+08	2.45599e+07	6.9	1.68637e+09	1.64512e+09	5	1.73475e+09	1.3672e+08	3.37275e+08	3.27266e+08	7.45315e+06	162	104	2	10	784500000
									1.60387e+09					3.20773e+08
palsa top frozen A 2	2014-08-13	2014-08-13	2.32444e+08														160	108	2	10	784500000
palsa top frozen B 1	2014-08-11	2014-08-11	2.29407e+08	2.26887e+08	3.56369e+06			7.1	1.62879e+09	1.6109e+09	5.01			3.25107e+08			193	132	2	10	784500000
									1593005700					3.17965e+08
pasla top frozen B 2	2014-08-14	2014-08-14	224367000														143	100	2	10	784500000
palsa top frozen C 1	2014-08-12	2014-08-12	1.92763e+08	1.91306e+08	2.06041e+06			9.8	1889076000	1874798100	5.66			3.33759e+08			129	105	2	10	784500000
									1.86052e+09					3.28714e+08
palsa top frozen C 2	2014-08-15	2014-08-15	189849000														121	100	2	10	784500000
palsa bottom frozen A 1	2014-08-12	2014-08-12	1.35757e+08	1.3203e+08	5.27147e+06	1.33049e+08	1.63925e+06	17.2	2.33503e+09	2.27092e+09	5.02	2.14193e+09	1.67451e+08	4.65145e+08	4.35901e+08	2.84731e+07	122	141	2	10	784500000
									2.2068e+09					4.39602e+08
palsa bottom frozen A 2	2014-08-13	2014-08-13	1.28302e+08														166	203	2	10	784500000
palsa bottom frozen B1	2014-08-14	2014-08-14	1.24956e+08	1.3494e+08	1.41185e+07			16.3	2.03679e+09	2.19952e+09	5.01			4.06544e+08			133	167	2	10	784500000
									2.36224e+09					4.71506e+08
palsa bottom frozen B2	2014-08-14	2014-08-14	1.44923e+08														121	131	2	10	784500000
palsa bottom frozen C 1	2014-08-07	2014-08-07	1.28373e+08	1.32176e+08	5.37915e+06			16	2.05396e+09	2.11482e+09	5.08			4.04324e+08			135	165	2	10	784500000
									2175680000					4.28283e+08
palsa bottom frozen C 2	2014-08-11	2014-08-11	135980000														143	165	2	10	784500000
erio top frozen A 1	2014-08-11	2014-08-11	8.95713e+07	8.73138e+07	3.19255e+06	1.11362e+08	3.00844e+07	24.2	2.16762e+09	2.11299e+09	4.72	2.5751e+09	6.12411e+08	4.59242e+08	4.99207e+08	6.19794e+07	149	261	2	10	784500000
									2.05836e+09					4.36094e+08
erio top frozen A 2	2014-08-15	2014-08-15	8.50563e+07														103	190	2	10	784500000
erio top frozen B 1	2014-08-07	2014-08-08	1.5542e+08	1.45096e+08	1.45994e+07			21.1	3.27936e+09	3.06153e+09	5.75			5.70323e+08			105	106	2	10	784500000
									2.84371e+09					4.94559e+08
erio top frozen B 2	2014-08-15	2014-08-18	1.34773e+08														134	156	2	10	784500000
erio top frozen C 1	2014-08-07	2014-08-07	8.93458e+07	1.01676e+08	1.74377e+07			25.5	2278318750	2.59274e+09	5.01			4.54754e+08			123	216	2	10	784500000
									2.90717e+09					5.80272e+08
erio top frozen C 2	2014-08-15	2014-08-15	1.14006e+08														101	139	2	10	784500000
erio bottom frozen A 1	2024-08-07	2014-08-07	9.85362e+07	1.03389e+08	6.86241e+06	1.1987e+08	1.4342e+07	28.4	2.79843e+09	2.93624e+09	5.02	3.28439e+09	4.22631e+08	5.57456e+08	6.34666e+08	4.59902e+07	130	207	2	10	784500000
									3.07405e+09					6.1236e+08
erio bottom frozen A 2	2014-08-15	2014-08-15	1.08241e+08														109	158	2	10	784500000
erio bottom frozen B 1	2014-08-11	2014-08-11	1.2826e+08	1.26708e+08	2.19366e+06			27.2	3.48866e+09	3.44647e+09	5.08			6.86744e+08			103	126	2	10	784500000
									3.40428e+09					6.70133e+08
erio bottom frozen B 2	2014-08-15	2014-08-18	1.25157e+08														138	173	2	10	784500000
erio bottom frozen C 1	2014-08-14	2014-08-14	1.28276e+08	1.29513e+08	1.74913e+06			27.8	3.56608e+09	3.60047e+09	5.62			6.34534e+08			121	148	2	10	784500000
									3634850000					6.4677e+08
erio bottom frozen C 2	2014-08-14	2014-08-15	130750000														105	126	2	10	784500000
sphag top cooled A 1	2014-08-12	2014-08-12	8.89567e+07	9.26826e+07	5.26917e+06	1.00161e+08	2.73039e+07	24.7	2.19723e+09	2.28926e+09	4.82	2.57484e+09	6.73905e+08	4.55857e+08	4.8802e+08	7.32471e+07	127	224	2	10	784500000
									2.38129e+09					4.94043e+08
sphag top cooled A 2	2014-08-13	2014-08-13	9.64084e+07														102	166	2	10	784500000
sphag top cooled B 1	2014-08-07	2014-08-07	8.14386e+07	7.7375e+07	5.74681e+06			26.7	2.17441e+09	2.06591e+09	4.96			4.38389e+08			109	210	2	10	784500000
									1.95741e+09					3.9464e+08
sphag top cooled B 2	2014-08-11	2014-08-11	7.33114e+07														107	229	2	10	784500000
sphag top cooled C 1	2014-08-07	2014-08-08	133051200	1.30424e+08	3.71487e+06			25.2	3352890240	3.28669e+09	5.74			5.84127e+08			106	125	2	10	784500000
									3.2205e+09					5.61063e+08
sphag top cooled C 2	2014-08-15	2014-08-18	1.27798e+08														101	124	2	10	784500000
sphag bottom cooled A 1	2014-08-14	2014-08-15	1.70744e+08	1.49615e+08	2.98817e+07	1.56537e+08	2.57046e+07	15.5	2.64653e+09	2.31903e+09	5.08	2.08441e+09	5.44634e+08	5.20971e+08	4.28036e+08	7.95323e+07	111	102	2	10	784500000
									1.99152e+09					3.92031e+08
sphag bottom cooled A 2	2014-08-14	2014-08-15	1.28485e+08														104	127	2	10	784500000
sphag bottom cooled B 1	2014-08-12	2014-08-12	117675000	1.35003e+08	2.45049e+07			17.4	2.04754e+09	2.34904e+09	5.04			4.06259e+08			102	136	2	10	784500000
									2.65054e+09					5.25902e+08
sphag bottom cooled B 2	2014-08-13	2014-08-13	1.5233e+08														100	103	2	10	784500000
sphag bottom cooled C 1	2014-08-12	2014-08-12	1.65866e+08	1.84994e+08	2.70515e+07			9.4	1.55914e+09	1.73894e+09	4.81			3.24145e+08			111	105	2	10	784500000
									1.91875e+09					3.98909e+08
sphag bottom cooled C 2	2014-08-13	2014-08-13	2.04122e+08														134	103	2	10	784500000
palsa top cooled A 1	2014-08-07	2014-08-08	1.73656e+08	1.68355e+08	7.49771e+06	1.7828e+08	1.14379e+07	9.9	1.7192e+09	1.66671e+09	5.08	1.62994e+09	9.49175e+07	3.38425e+08	3.12865e+08	4.03374e+07	114	103	2	10	784500000
									1.61422e+09					3.17761e+08
palsa top cooled A 2	2014-08-14	2014-08-14	1.63053e+08														106	102	2	10	784500000
palsa top cooled B 1	2014-08-07	2014-08-08	2.21772e+08	1.90789e+08	4.3817e+07			6.9	1.53023e+09	1.31644e+09	4.19			3.65209e+08			147	104	2	10	784500000
									1.10266e+09					2.63164e+08
pasla top cooled B 2	2014-08-15	2014-08-15	1.59806e+08														110	108	2	10	784500000
palsa top cooled C 1	2014-08-07	2014-08-08	192987000	1.75698e+08	2.44506e+07			8.5	1640389500	1.49343e+09	5.04			3.25474e+08			123	100	2	10	784500000
									1.34647e+09					2.67157e+08
palsa top cooled C 2	2014-08-14	2014-08-14	1.58409e+08														105	104	2	10	784500000
palsa bottom cooled A 1	2014-08-07	2014-08-07	66525600	7.34834e+07	9.83976e+06	1.044e+08	3.11219e+07	15.7	1044451920	1.15369e+09	4.62	1.30192e+09	4.29135e+08	2.26072e+08	2.72516e+08	4.15427e+07	106	250	2	10	784500000
									1.26293e+09					2.73361e+08
palsa bottom cooled A 2	2014-08-11	2014-08-11	8.04411e+07														101	197	2	10	784500000
palsa bottom cooled B 1	2014-08-12	2014-08-12	1.51035e+08	1.35723e+08	#REF!			11.9	1.79731e+09	1.6151e+09	5.58			3.22099e+08			103	107	2	10	784500000
									1.4329e+09					2.56792e+08
palsa bottom cooled B 2	2014-08-13	2014-08-13	1.20412e+08														99	129	2	10	784500000
palsa bottom cooled C 1	2014-08-12	2014-08-12	8.7933e+07	1.03993e+08	2.27118e+07			12.1	1.06399e+09	1.25831e+09	4.52			2.35396e+08			102	182	2	10	784500000
									1452632500					3.21379e+08
palsa bottom cooled C 2	2014-08-15	2014-08-18	1.20052e+08														101	132	2	10	784500000
erio top cooled A 1	2014-08-11	2014-08-11	61714000	6.80371e+07	8.94221e+06	1.02443e+08	3.24731e+07	28.8	1777363200	1.95947e+09	4.37	2.46817e+09	6.00519e+08	4.06719e+08	4.86835e+08	4.24641e+07	118	300	2	10	784500000
									2.14157e+09					4.90063e+08
erio top cooled A 2	2014-08-14	2014-08-14	7.43602e+07														100	211	2	10	784500000
erio top cooled B 1	2014-08-07	2014-08-08	104600000	1.06735e+08	3.01891e+06			26.4	2761440000	2.8178e+09	5.43			5.08552e+08			108	162	2	10	784500000
									2.87415e+09					5.2931e+08
erio top cooled B 2	2014-08-07	2014-08-08	1.08869e+08														102	147	2	10	784500000
erio top cooled C 1	2014-08-13	2014-08-14	1.29669e+08	1.32557e+08	4.08295e+06			22.1	2.86569e+09	2.9295e+09	5.94			4.8244e+08			100	121	2	10	784500000
									2.9933e+09					5.03923e+08
erio top cooled C 2	2014-08-14	2014-08-15	1.35444e+08														101	117	2	10	784500000
erio bottom cooled A 1	2014-08-14	2014-08-15	200047500	1.83088e+08	2.39837e+07	1.29632e+08	4.63333e+07	19.1	3.82091e+09	3.49699e+09	6.06	3.02859e+09	6.88012e+08	6.30513e+08	5.9904e+08	7.59473e+07	153	120	2	10	784500000
									3.17307e+09					5.23609e+08
erio bottom cooled A 2	2014-08-14	2014-08-15	1.66129e+08														108	102	2	10	784500000
erio bottom cooled B 1	2014-08-07	2014-08-07	8.96571e+07	1.01016e+08	1.60635e+07			28.8	2.58213e+09	2.90925e+09	4.92			5.24822e+08			100	175	2	10	784500000
									3.23638e+09					6.57801e+08
erio bottom cooled B 2	2014-08-15	2014-08-18	1.12374e+08														106	148	2	10	784500000
erio bottom cooled C 1	2014-08-12	2014-08-12	9.21898e+07	1.04791e+08	1.78212e+07			29.1	2.68272e+09	3.04943e+09	4.85			5.53139e+08			104	177	2	10	784500000
									3.41613e+09					7.04357e+08
erio bottom cooled C 2	2014-08-13	2014-08-13	1.17393e+08														104	139	2	10	784500000

## Sheet: Exp 3
Sample	Virus Concentration (ml-1)	average	stdev	nvirus	nbeads	Vbeads (ul)	Vsample (ul)	Cbeads (bead stock conc ml-1)	volume	per gram	STDEV	Starting soil	total phages	SD	ave. total phage
sphag bottom frozen	1.31594e+08	1.28225e+08	4.76343e+06	104	124	2	10	784500000	18.5	4.97849e+08	1.80212e+07	4.89	2.43448e+09	8.81234e+07	2.37217e+09
sphag bottom frozen	1.24857e+08			113	142	2	10	784500000		4.72363e+08			2.30986e+09
sphag bottom cooled	1.15671e+08	1.2656e+08	1.53999e+07	101	137	2	10	784500000	17.4	4.04151e+08	5.3807e+07	4.98	2.01267e+09	2.67959e+08	2.20215e+09
sphag bottom cooled	1.3745e+08			106	121	2	10	784500000		4.80246e+08			2.39162e+09
erio bottom frozen	8.85302e+07	9.59031e+07	1.04268e+07	101	179	2	10	784500000	28.4	4.7982e+08	5.65119e+07	5.24	2.51426e+09	2.96122e+08	2.72365e+09
erio bottom frozen	1.03276e+08			104	158	2	10	784500000		5.5974e+08			2.93304e+09
erio bottom cooled	1.29933e+08	1.33686e+08	5.30805e+06	106	128	2	10	784500000	17	4.18344e+08	1.70903e+07	5.28	2.20886e+09	9.02369e+07	2.27266e+09
erio bottom cooled	1.3744e+08			113	129	2	10	784500000		4.42514e+08			2.33647e+09
palsa bottom frozen	8.94067e+07	9.24555e+07	4.31169e+06	102	179	2	10	784500000	16.5	2.92701e+08	1.41156e+07	5.04	1.47521e+09	7.11428e+07	1.52552e+09
palsa bottom frozen	9.55043e+07			112	184	2	10	784500000		3.12663e+08			1.57582e+09
palsa bottom cooled	1.07802e+08	1.20952e+08	1.85973e+07	101	147	2	10	784500000	11.9	2.61272e+08	4.50728e+07	4.91	1.28284e+09	2.21308e+08	1.43933e+09
palsa bottom cooled	1.34103e+08			100	117	2	10	784500000		3.25014e+08			1.59582e+09
SBF A	1.72435e+08	2.03504e+08	4.39386e+07	111	101	2	10	784500000	4.95	3.49101e+08	8.89555e+07	2.445	8.53552e+08	2.17496e+08	1.00734e+09
SBF A	2.34573e+08			151	101	2	10	784500000		4.74903e+08			1.16114e+09
SBF B	208677000	182788500	3.66119e+07	133	100	2	10	784500000	5.12	4.36984e+08	7.66678e+07	2.445	1068426240	1.87453e+08	935877120
SBF B	156900000			120	120	2	10	784500000		3.2856e+08			803328000
SBC A	219660000	2.47689e+08	3.96386e+07	140	100	2	10	784500000	4.89	4.3138e+08	7.78445e+07	2.49	1074137400	1.93833e+08	1.2112e+09
SBC A	2.75717e+08			181	103	2	10	784500000		5.41469e+08			1.34826e+09
SBC B	2.70729e+08	3.0011e+08	4.155e+07	176	102	2	10	784500000	4.95	5.38197e+08	8.25994e+07	2.49	1.34011e+09	2.05673e+08	1.48554e+09
SBC B	329490000			231	110	2	10	784500000		6.5501e+08			1630975500
EBF A	2.12276e+08	2.19891e+08	1.07682e+07	138	102	2	10	784500000	5.31	4.30224e+08	2.18241e+07	2.62	1.12719e+09	5.71791e+07	1.16762e+09
EBF A	227505000			145	100	2	10	784500000		4.61088e+08			1208051550
EBF B	2.29539e+08	2.49794e+08	2.8645e+07	158	108	2	10	784500000	5.43	4.75724e+08	5.93673e+07	2.62	1.2464e+09	1.55542e+08	1.35638e+09
EBF B	2.70049e+08			179	104	2	10	784500000		5.59682e+08			1.46637e+09
EBC A	2.69624e+08	2.90943e+08	3.01493e+07	177	103	2	10	784500000	4.74	4.84098e+08	5.41316e+07	2.64	1.27802e+09	1.42907e+08	1.37907e+09
EBC A	3.12262e+08			203	102	2	10	784500000		5.60652e+08			1.48012e+09
EBC B	287127000	3.06441e+08	2.73136e+07	183	100	2	10	784500000	5.17	562290375	5.34892e+07	2.64	1484446590	1.41211e+08	1.5843e+09
EBC B	3.25754e+08			218	105	2	10	784500000		6.37935e+08			1.68415e+09
PBF A	2.56073e+08	2.63815e+08	1.09496e+07	173	106	2	10	784500000	5.31	5.39582e+08	2.30723e+07	2.52	1.35975e+09	5.81423e+07	1.40086e+09
PBF A	2.71558e+08			180	104	2	10	784500000		5.72211e+08			1.44197e+09
PBF B	3.0914e+08	3.35081e+08	3.66866e+07	199	101	2	10	784500000	4.88	5.98651e+08	7.10439e+07	2.52	1.5086e+09	1.79031e+08	1.6352e+09
PBF B	3.61022e+08			237	103	2	10	784500000		6.99123e+08			1.76179e+09
PBC A	2.09718e+08	2.20996e+08	1.59493e+07	135	101	2	10	784500000	4.9	4.18581e+08	3.18336e+07	2.455	1.02762e+09	7.81515e+07	1.08288e+09
PBC A	2.32274e+08			151	102	2	10	784500000		4.63601e+08			1.13814e+09
PBC B	3.24674e+08	3.32574e+08	1.11714e+07	209	101	2	10	784500000	4.95	6.54639e+08	2.25248e+07	2.455	1.60714e+09	5.52984e+07	1.64624e+09
PBC B	340473000			217	100	2	10	784500000		6.86493e+08			1685341350
SBF A CsCl	3.57083e+08	2.95926e+08	8.6489e+07	132	116	2	5	784500000	2.537	3.70519e+08	8.97434e+07	2.445	9.05919e+08	2.19423e+08	7.50764e+08
SBF A CsCl	2.34769e+08			101	135	2	5	784500000		2.43603e+08			5.95609e+08
SBF B CsCl	2.85273e+08	2.73018e+08	1.73307e+07	100	110	2	5	784500000	2.688	3.13625e+08	1.90532e+07	2.445	7.66813e+08	4.6585e+07	7.33873e+08
SBF B CsCl	2.60763e+08			118	142	2	5	784500000		2.8668e+08			7.00932e+08
SBC A CsCl	2.05098e+08	2.48341e+08	6.11549e+07	100	153	2	5	784500000	2.69	2.21572e+08	6.60669e+07	2.49	5.51714e+08	1.64507e+08	6.68037e+08
SBC A CsCl	2.91584e+08			105	113	2	5	784500000		3.15004e+08			7.84361e+08
SBC B CsCl	2.96838e+08	2.84854e+08	1.69481e+07	105	111	2	5	784500000	2.73	3.25449e+08	1.85817e+07	2.49	8.10367e+08	4.62684e+07	7.77651e+08
SBC B CsCl	2.7287e+08			100	115	2	5	784500000		2.9917e+08			7.44934e+08
EBF A CsCl	2.70887e+08	2.65612e+08	7.45955e+06	101	117	2	5	784500000	2.679	2.76987e+08	7.62754e+06	2.62	7.25707e+08	1.99841e+07	7.11576e+08
EBF A CsCl	2.60338e+08			112	135	2	5	784500000		2.662e+08			6.97445e+08
EBF B CsCl	2.68205e+08	3.03072e+08	4.93089e+07	100	117	2	5	784500000	2.662	2.72505e+08	5.00994e+07	2.62	7.13962e+08	1.3126e+08	8.06777e+08
EBF B CsCl	3.37938e+08			112	104	2	5	784500000		3.43356e+08			8.99592e+08
EBC A CsCl	2.49557e+08	2.81679e+08	4.54263e+07	101	127	2	5	784500000	2.56	2.41995e+08	4.40498e+07	2.64	6.38867e+08	1.16291e+08	7.21098e+08
EBC A CsCl	313800000			108	108	2	5	784500000		3.04291e+08			803328000
EBC B CsCl	3.19893e+08	3.63615e+08	6.18318e+07	105	103	2	5	784500000	2.706	3.27891e+08	6.33776e+07	2.64	8.65631e+08	1.67317e+08	9.83942e+08
EBC B CsCl	4.07337e+08			135	104	2	5	784500000		4.1752e+08			1.10225e+09
PBF A CsCl	3.82894e+08	3.63149e+08	2.79235e+07	133	109	2	5	784500000	2.628	3.99303e+08	2.91202e+07	2.52	1.00624e+09	7.3383e+07	9.54355e+08
PBF A CsCl	3.43404e+08			116	106	2	5	784500000		3.58121e+08			9.02465e+08
PBF B CsCl	2.01241e+08	2.41565e+08	5.70259e+07	118	184	2	5	784500000	2.773	2.21445e+08	6.27511e+07	2.52	5.58042e+08	1.58133e+08	6.69859e+08
PBF B CsCl	2.81888e+08			106	118	2	5	784500000		3.10189e+08			7.81676e+08
PBC A CsCl	1.76292e+08	2.30168e+08	7.61914e+07	100	178	2	5	784500000	2.068	1.48502e+08	6.41808e+07	2.455	3.64572e+08	1.57564e+08	4.75987e+08
PBC A CsCl	2.84043e+08			105	116	2	5	784500000		2.39267e+08			5.87401e+08
PBC B CsCl	1.98805e+08	2.53342e+08	7.71272e+07	102	161	2	5	784500000	2.129	1.72406e+08	6.68854e+07	2.455	4.23256e+08	1.64204e+08	5.39365e+08
PBC B CsCl	3.07879e+08			104	106	2	5	784500000		2.66996e+08			6.55475e+08
	A is without BSA	B is with BSA
	Top group is no Amicon or CsCl
	Middle is after Amicon
	Bottom is after CsCl
