# Supplementary material for: Optimization of viral resuspension methods for carbon-rich soils along a permafrost thaw gradient
Source: PubMed Central journal article supplement (PMC4878379; doi:10.7717/peerj.1999), 2016-05-17

**A) Frozen samples**

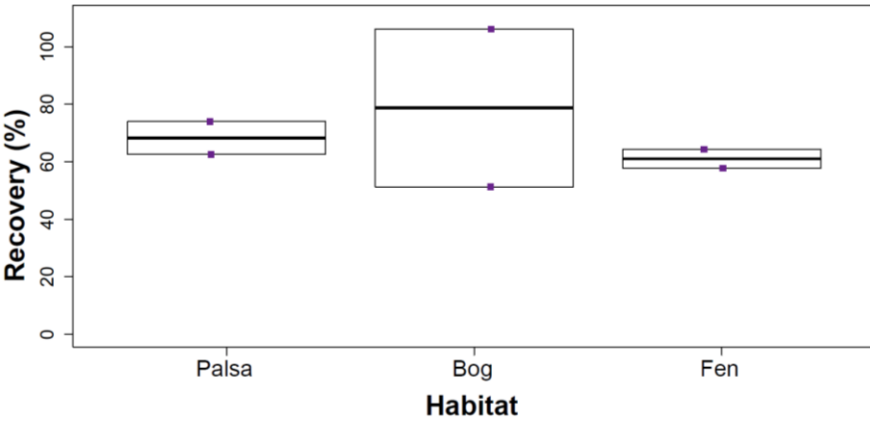

**B) Frozen samples + BSA**

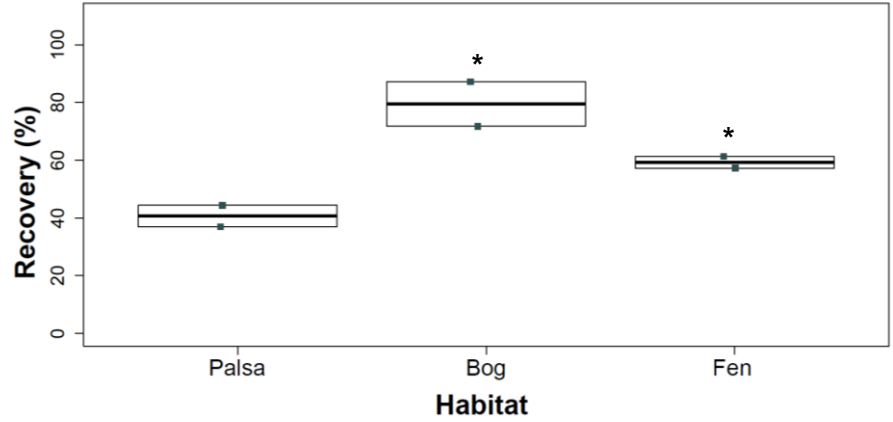

**C) Chilled samples**

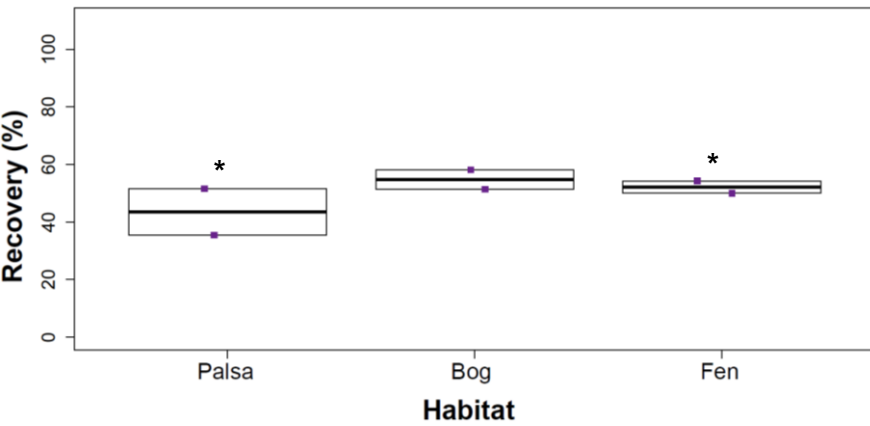

**D) Chilled samples + BSA**

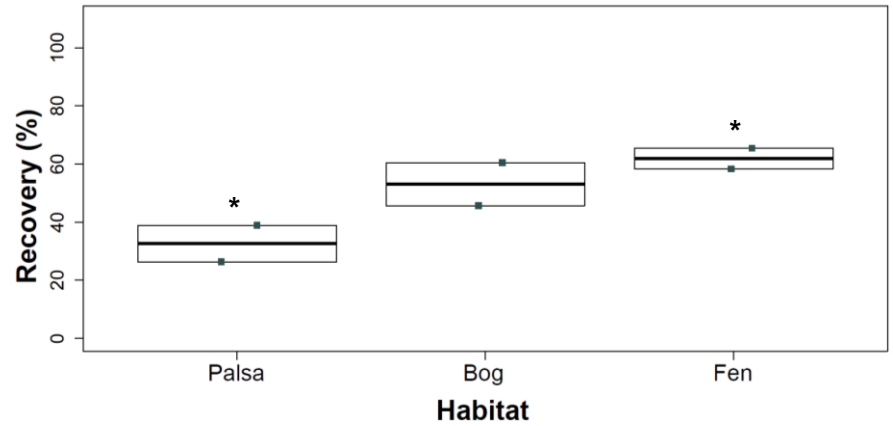

Supplement: peerj-04-1999-s003.pdf [file peerj-04-1999-s003.pdf]
